# Supplementary material for: Structural study of decrespignyite-(Y), a complex yttrium rare earth copper carbonate chloride, by three-dimensional electron and synchrotron powder diffraction
Source: Copernicus journal article supplement (doi:10.5194/ejm-32-545-2020), 2020-10-23
Supplement: Supplementary file 1 [file ejm-32-545-2020-supplement.zip]

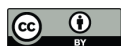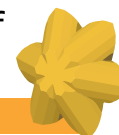

## *Supplement of*

# **Structural study of decrespignyite-(Y), a complex yttrium rare earth copper carbonate chloride, by three-dimensional electron and synchrotron powder diffraction**

**Jordi Rius et al.**

*Correspondence to:* Xavier Torrelles ([torrelles@icmab.es](mailto:torrelles@icmab.es))

- `ejm-32-545-2020-supplement-title-page.pdf`
- `Last_refinement_distances.OLS`
- `__MACOSX`
  - `._Last_refinement_distances.OLS`
  - `._decrespignyite_Ciffile.CIF`
- `decrespignyite_Ciffile.CIF`
- `decrespignyite_synchrotron_powder_pattern-data.dat`

The copyright of individual parts of the supplement might differ from the CC BY 4.0 License.
